# Supplementary material for: Fermentation Performances and Aroma Contributions of Selected Non-Saccharomyces Yeasts for Cherry Wine Production
Source: MDPI journal article supplement (doi:10.3390/foods13152455), 2024-08-03
Supplement: s1 [file s1]

SUPPLEMENTARY MATERIALS

Figure S1. Experimental design used in the study.

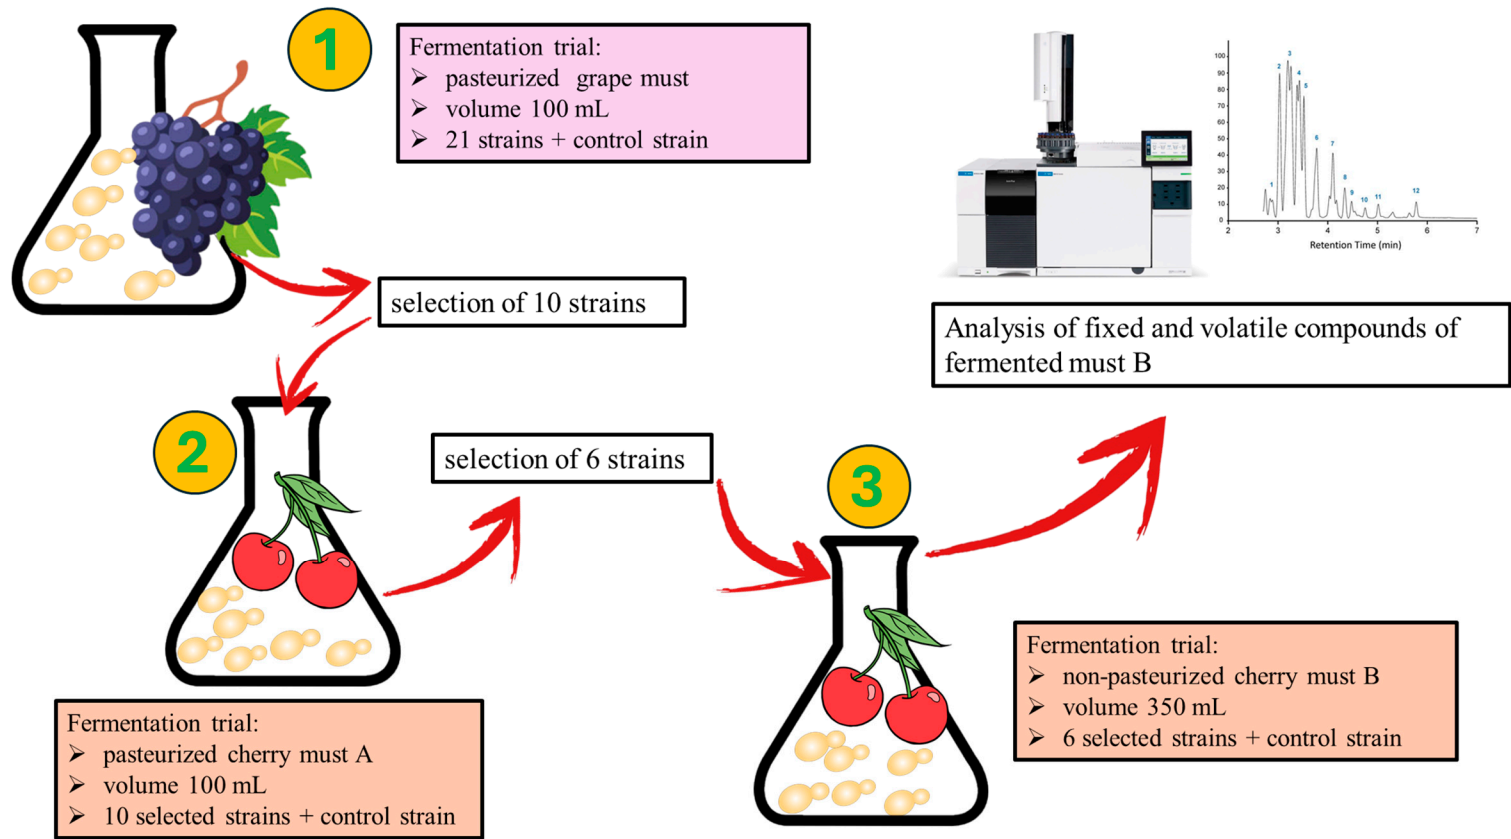

**Table S1.** List of 21 strains used in this study with related Genbank accession number of D1/D2 sequence region.

| Species                                   | strain | source      | accession number | reference                     |
|-------------------------------------------|--------|-------------|------------------|-------------------------------|
| <i>Hanseniaspora meyeri</i>               | Y1A    | apple juice | MG478470         | Lorenzini et al. 2018         |
| <i>Hanseniaspora osmophila</i>            | Ho3    | grape       | PP107913         | Lorenzini and Zapparoli, 2019 |
| <i>Hanseniaspora osmophila</i>            | Ho22   | grape       | PP107914         | Lorenzini and Zapparoli, 2019 |
| <i>Hanseniaspora pseudoguilliermondii</i> | YR6    | apple juice | MG478474         | Lorenzini et al. 2018         |
| <i>Hanseniaspora vineae</i>               | Hv1    | grape       | PP107915         | Lorenzini and Zapparoli, 2019 |
| <i>Hanseniaspora vineae</i>               | Hv20   | grape       | PP107916         | Lorenzini and Zapparoli, 2019 |
| <i>Hanseniaspora vineae</i>               | Hv45   | grape       | PP107917         | Lorenzini and Zapparoli, 2019 |
| <i>Hanseniaspora valbiensis</i>           | Y2D    | apple juice | MG478468         | Lorenzini et al. 2018         |
| <i>Lachancea fermentati</i>               | Lf2    | olive oil   | PP107918         | this study                    |
| <i>Lachancea lanzarotesis</i>             | Ll5    | grape       | PP107919         | Lorenzini and Zapparoli, 2019 |
| <i>Lachancea lanzarotesis</i>             | Ll7    | grape       | PP107920         | Lorenzini and Zapparoli, 2019 |
| <i>Starmerella bacillaris</i>             | Stb3   | grape       | PP107921         | Lorenzini and Zapparoli, 2019 |
| <i>Starmerella bacillaris</i>             | Stb7   | grape       | PP107922         | Lorenzini and Zapparoli, 2019 |
| <i>Starmerella bacillaris</i>             | Stb34  | grape       | PP107923         | Lorenzini and Zapparoli, 2019 |
| <i>Starmerella bacillaris</i>             | Stb142 | grape       | PP107924         | Lorenzini and Zapparoli, 2019 |
| <i>Starmerella bacillaris</i>             | Stb91  | grape       | PP107925         | Lorenzini and Zapparoli, 2019 |
| <i>Torulaspora delbrueckii</i>            | Tb7    | grape       | PP107926         | Lorenzini and Zapparoli, 2019 |
| <i>Wickerhamomyces anomalus</i>           | Wa847  | wine        | PP107939         | this study                    |
| <i>Zygosaccharomyces bailii</i>           | Zb17   | grape       | PP107927         | Lorenzini and Zapparoli, 2019 |
| <i>Zygosaccharomyces bailii</i>           | Zb19   | grape       | PP107928         | Lorenzini and Zapparoli, 2019 |
| <i>Zygosaccharomyces bailii</i>           | Zb23   | vinegar     | PP107938         | this study                    |

**Figure S2.** Kinetics of CO<sub>2</sub> production (% w/v) during the fermentation of cherry must B by six selected yeasts and *S. cerevisiae* EC1118® (control).

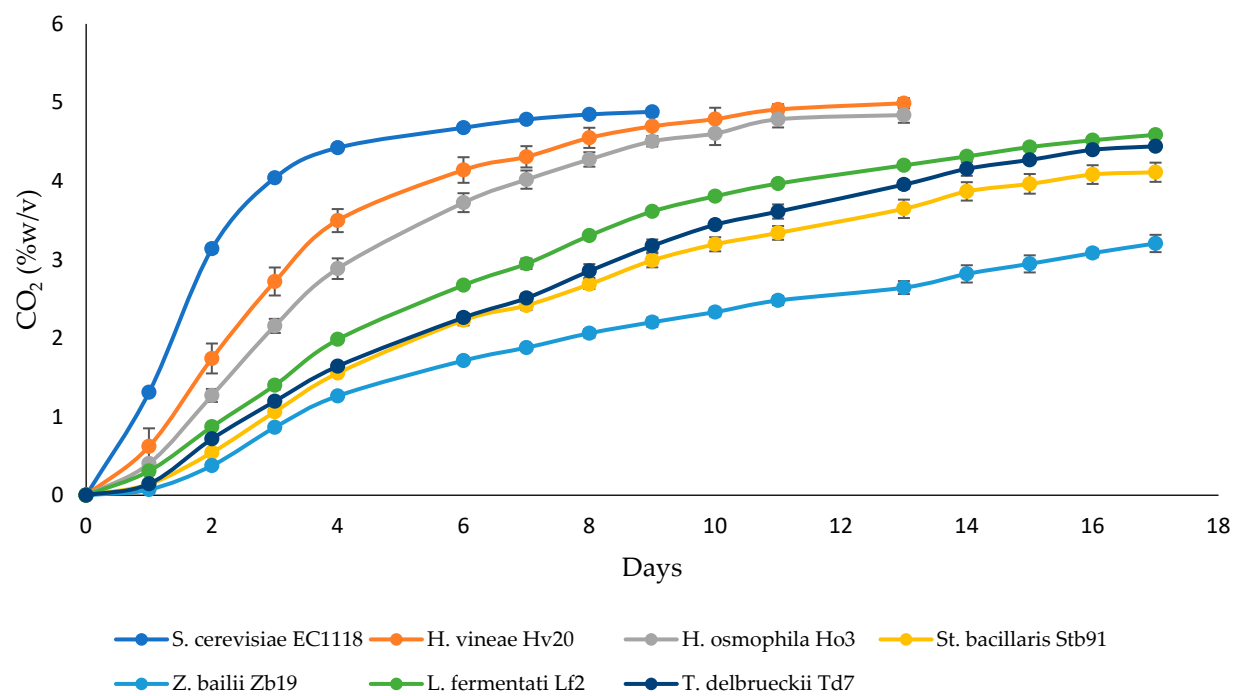

**Figure S3.** Total amount of acetate esters (blue columns), fatty acid ethyl esters (red columns) and fatty acids (green columns) detected in cherry-based wines fermented by *S. cerevisiae* EC1118® (control), *T. delbrueckii* Td7 (TD), *H. vineae* Hv20 (HV), *H. osmophila* Ho3 (HO), *L. fermentati* Lf2 (LF), *St. bacillaris* Stb91 (STB) and *Z. bailii* Zb19 (ZB).

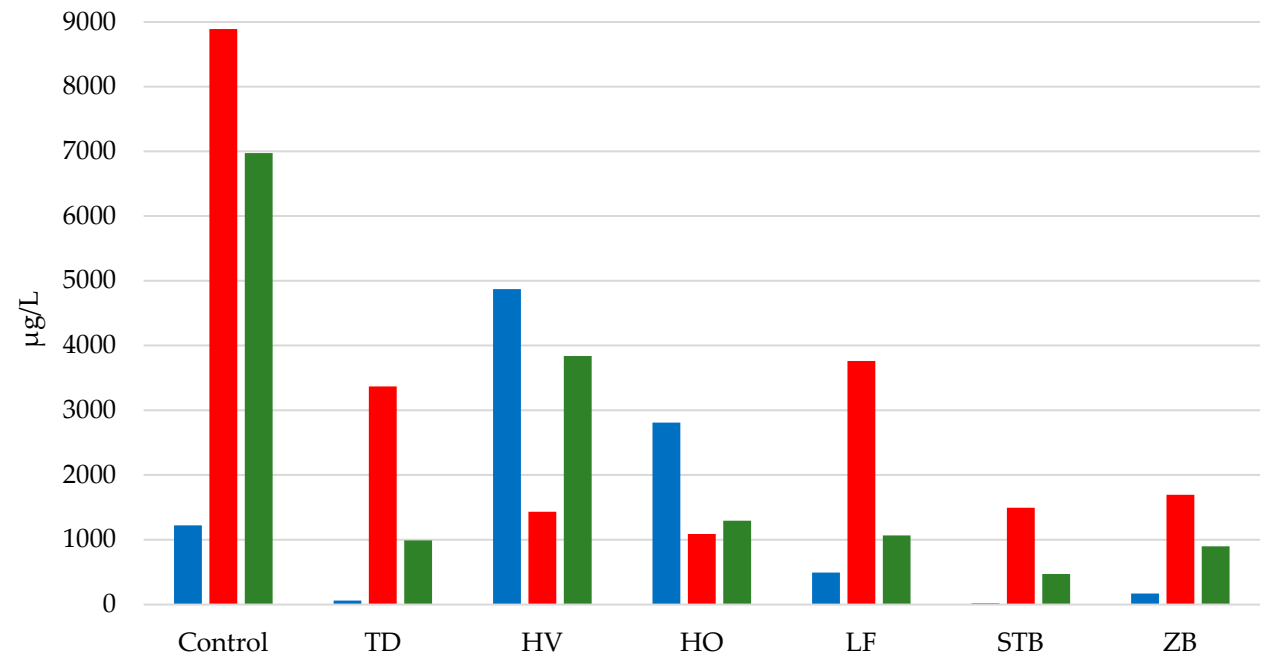

**Table S2.** Compounds detected above their respective thresholds and relative OAV of cherry-based wines produced by *S. cerevisiae* EC1118® (control), *T. delbrueckii* Td7 (TD), *H. vineae* Hv20 (HV), *H. osmophila* Ho3 (HO), *L. fermentati* Lf2 (LF), *St. bacillaris* Stb91 (STB) and *Z. bailii* Zb19 (ZB). Values are mean with standard deviation of three independent trials.

|                       | odour<br>threshold<br>(µg/L) <sup>1</sup> | descriptors         | OAV     |      |      |      |      |      |      |
|-----------------------|-------------------------------------------|---------------------|---------|------|------|------|------|------|------|
|                       |                                           |                     | control | TD   | HV   | HO   | LF   | STB  | ZB   |
| Isoamyl acetate       | 30                                        | banana              | 31.5    | 0.4  | 2.1  | 1.5  | 5.2  | 0.2  | 1.6  |
| Phenylethyl acetate   | 250                                       | rosa, floreal       | 1.1     | 0.2  | 19.2 | 11.1 | 1.3  | 0.0  | 0.5  |
| Ethyl butyrate        | 20                                        | fruity              | 3.1     | 1.3  | 1.1  | 1.2  | 1.3  | 1.6  | 1.2  |
| Ethyl hexanoate       | 14                                        | fruity, anise       | 20.3    | 1.1  | 0.7  | 0.3  | 0.5  | 0.1  | 0.4  |
| Ethyl decanoate       | 200                                       | caramel, fruity     | 0.8     | 0.2  | 1.4  | 0.9  | 0.3  | 0.3  | 0.3  |
| Ethyl cinnamate       | 1.1                                       | cinnamon, balsamic  | 2.3     | 2.1  | 3.1  | 3.6  | 1.3  | 2.5  | 2.2  |
| 2-Phenylethyl alcohol | 14                                        | floreal, rose       | 0.9     | 1.0  | 0.7  | 0.5  | 0.8  | 1.1  | 1.2  |
| 4-Vinylguaiacol       | 40                                        | spice, curry        | 7.0     | 1.4  | 0.4  | 0.2  | 0.4  | 0.3  | 0.3  |
| 4-Vinylphenol         | 180                                       | phenolic, medicinal | 8.7     | 0.1  | 0.1  | 0.0  | 0.1  | 0.0  | 0.1  |
| Eugenol               | 6                                         | clove, spice        | 17.2    | 21.7 | 21.8 | 21.5 | 10.8 | 11.9 | 19.2 |
| Phenylacetaldehyde    | 1                                         | floreal, honey      | 9.1     | 19.3 | 10.5 | 5.7  | 5.4  | 8.9  | 6.3  |
| Butyric acid          | 173                                       | cheese              | 0.9     | 1.2  | 0.8  | 0.8  | 0.8  | 0.7  | 1.1  |
| Isovaleric acid       | 33                                        | candy, cheese       | 5.3     | 5.1  | 4.1  | 3.7  | 4.9  | 3.4  | 5.3  |
| Hexanoic acid         | 420                                       | cheese, greasy      | 2.9     | 0.4  | 0.3  | 0.2  | 0.3  | 0.1  | 0.2  |
| Octanoic acid         | 500                                       | cheese, rancid      | 6.9     | 0.5  | 1.1  | 0.3  | 0.4  | 0.1  | 0.3  |
| Decanoic acid         | 1000                                      | rancid fat          | 1.9     | 0.1  | 2.8  | 0.5  | 0.4  | 0.1  | 0.2  |

<sup>1</sup>Escudero A, Campo E, Fariña L, *et al.* Analytical characterization of the aroma of five premium red wines. Insights into the role of odor families and the concept of fruitiness of wines *J. Agric. Food Chem.* 2007;**55**:4501–4510.

**Table S3.** Results of AHC for cherry-based wines and aroma compounds. Values indicating the optimal selection of clusters for AHC are in bold.

| of clusters for HNC are in bold, |       |              |       |       |                 |               |       |       |
|----------------------------------|-------|--------------|-------|-------|-----------------|---------------|-------|-------|
| cherry-based wines               |       |              |       |       | aroma compounds |               |       |       |
| results by class                 |       |              |       |       |                 |               |       |       |
| number of clusters               | 2     | 3            | 4     | 5     | 2               | 3             | 4     | 5     |
| Hartigan index (H)               | 2.686 | 2.100        | 1.801 | 1.479 | 24.312          | 12.692        | 6.630 | 5.870 |
| H(k-1) - H(k)                    | 0.013 | <b>0.586</b> | 0.300 | 0.321 | -5.614          | <b>11.620</b> | 6.062 | 0.760 |
| results by cluster               |       |              |       |       |                 |               |       |       |
| clusters                         | W1    | W3           | W2    |       | C2              | C3            | C1    |       |
| Silhouette scores                | -     | 0.124        | 0.429 |       | 0.643           | 0.324         | 0.163 |       |

**Figure S4.** PLS-DA plot of the two components (t1 and t2) obtained by analyzing aroma compounds of cherry-based wines produced by *S. cerevisiae* EC1118® (control), *T. delbrueckii* Td7 (TD), *H. vineae* Hv20 (HV), *H. osmophila* Ho3 (HO), *L. fermentati* Lf2 (LF), *St. bacillaris* Stb91 (STB) and *Z. bailii* Zb19 (ZB).

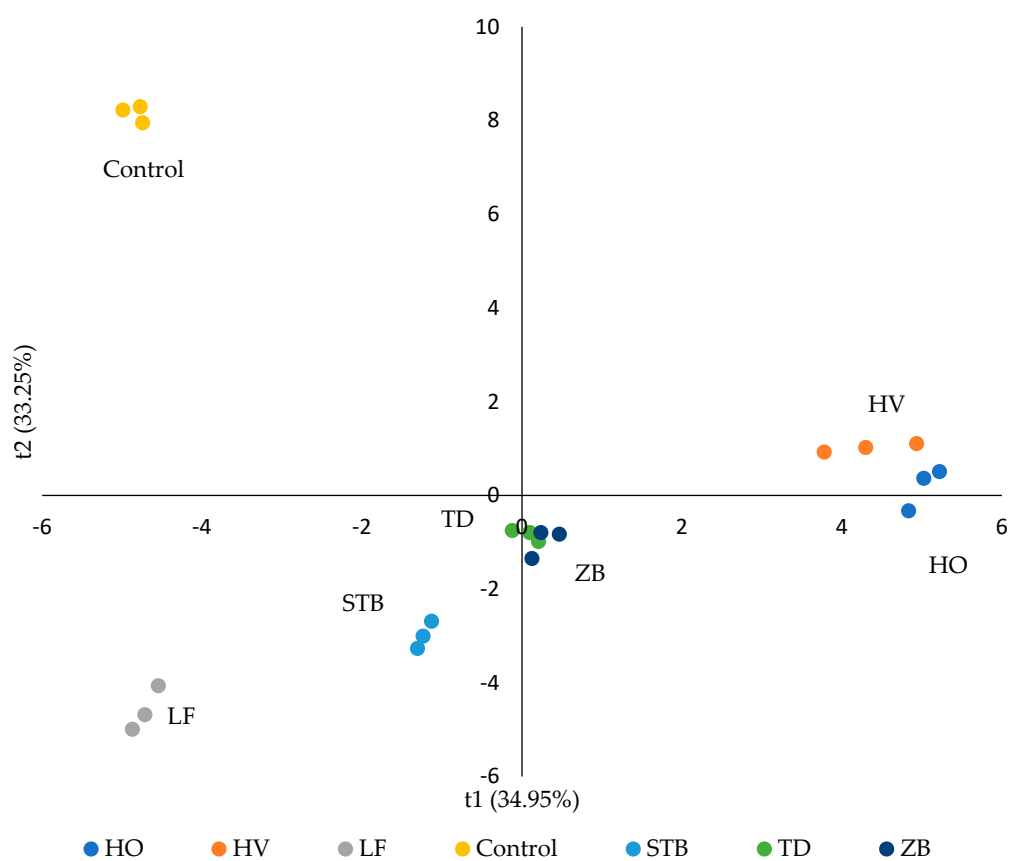

**Figure S5.** PCA plot of the two factors (F1 and F2) obtained by analyzing all compounds of cherry-based wines produced by *S. cerevisiae* EC1118® (control), *T. delbrueckii* Td7 (TD), *H. vineae* Hv20 (HV), *H. osmophila* Ho3 (HO), *L. fermentati* Lf2 (LF), *St. bacillaris* Stb91 (STB) and *Z. bailii* Zb19 (ZB).

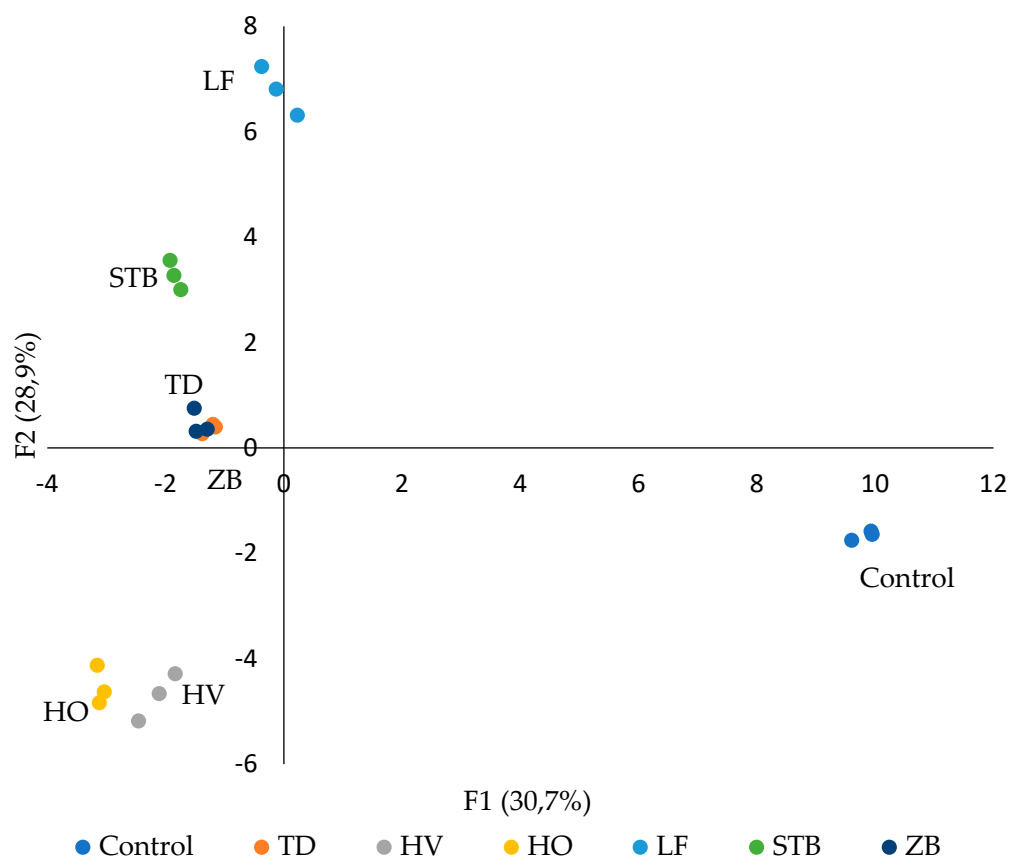

**Table S4.** Loading factors of compounds analysed in cherry-based wines obtained by PCA with values <- 0.800 or > 0.800 at least in one of the two F1 and F2.

|                          | F1     | F2     |
|--------------------------|--------|--------|
| Glycerol                 | -0.424 | -0.805 |
| Hexyl acetate            | 0.937  | -0.290 |
| Isoamyl acetate          | 0.950  | -0.271 |
| Ethyl butyrate           | 0.880  | -0.311 |
| Ethyl hexanoate          | 0.966  | -0.198 |
| Ethyl octanoate          | 0.966  | -0.113 |
| Ethyl tetradecanoate     | -0.270 | 0.825  |
| Ethyl 4-hydroxybutyrate  | 0.843  | -0.500 |
| Diethyl succinate        | 0.905  | -0.334 |
| Ethyl vanillate          | -0.019 | 0.806  |
| Etyl cinnamate           | 0.045  | 0.835  |
| <i>cis</i> -3-Hexen-1-ol | 0.840  | 0.375  |
| 3-Methylthio-1-propanol  | 0.867  | -0.333 |
| Vanillic alcohol         | -0.086 | 0.909  |
| Linalool                 | -0.447 | -0.854 |
| $\alpha$ -Terpineol      | -0.470 | -0.821 |
| 4-Vinylguaiacol          | 0.961  | -0.209 |
| 4-Vinylphenol            | 0.958  | -0.203 |
| Eugenol                  | 0.166  | 0.843  |
| Benzaldehyde             | 0.834  | 0.123  |
| Hexanoic acid            | 0.972  | -0.185 |
| Octanoic acid            | 0.979  | -0.145 |
| Homovanillic acid        | 0.831  | 0.233  |
